# Supplementary material for: A Crypt-Specific Core Microbiota Resides in the Mouse Colon
Source: PubMed Central journal article supplement — mBio. 2012 May 22;3(3):e00116-12. doi: 10.1128/mBio.00116-12 (PMC3372965; doi:10.1128/mbio.00116-12), 2012-05-22
Supplement: mbo003121275sf01.pdf [file mbo003121275sf01.pdf]

**A**

Small Intestine

Cecum

Proximal Colon

Distal Colon

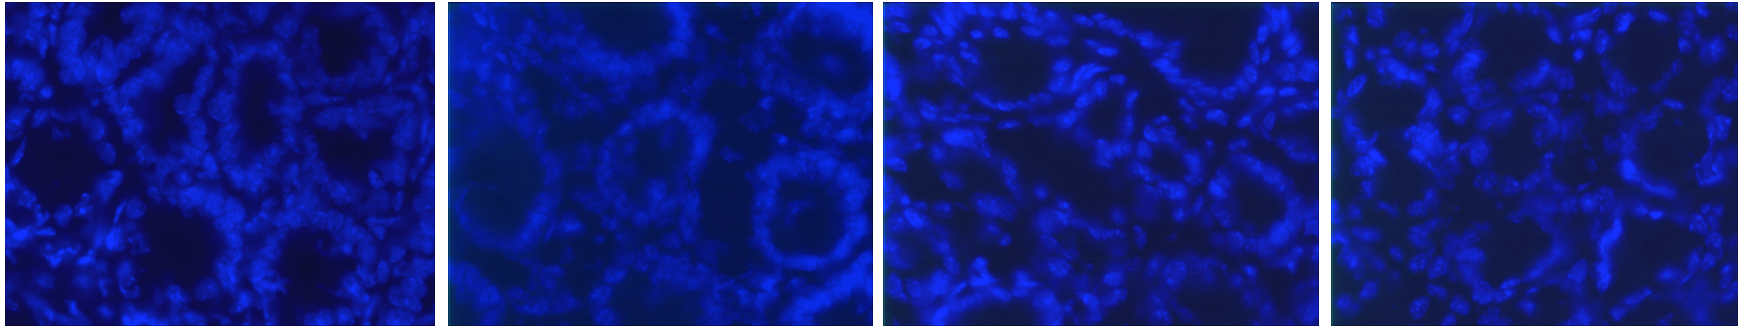**B**

Proximal Colon

Luminal section

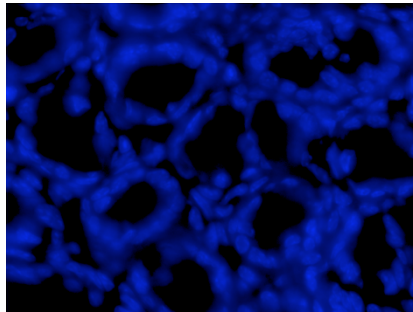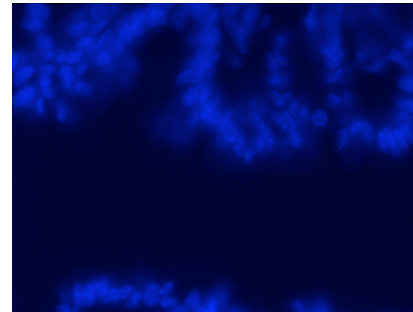

**Figure S1:** (A) : FISH using the no-bacteria probe on different sections of the intestine of C57Bl/6 mice. (B) : FISH with the pan-bacteria probe Eub338 at the proximal colon and the lumen of germ-free C3H/HeN mice.
