# Supplementary material for: A Crypt-Specific Core Microbiota Resides in the Mouse Colon
Source: PubMed Central journal article supplement — mBio. 2012 May 22;3(3):e00116-12. doi: 10.1128/mBio.00116-12 (PMC3372965; doi:10.1128/mbio.00116-12), 2012-05-22
Supplement: mbo003121275sf03.pdf [file mbo003121275sf03.pdf]

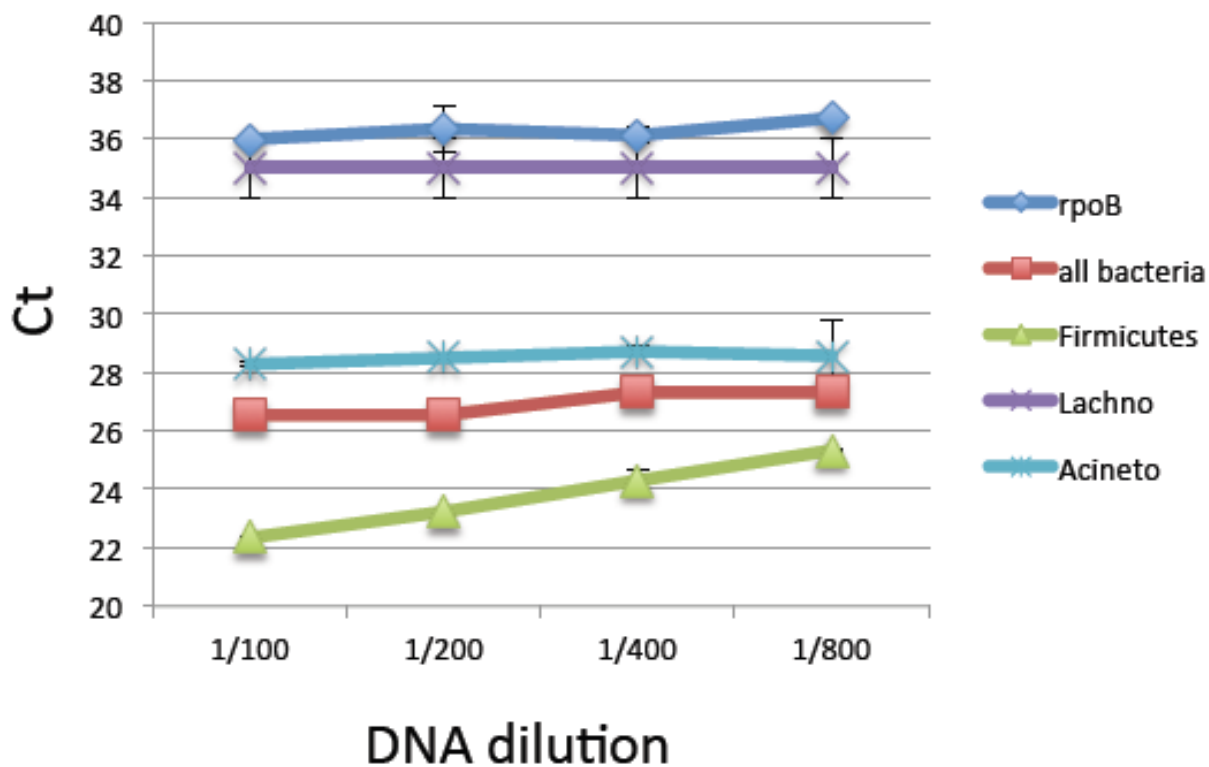

**Figure S3** : qRT-PCR experiments on DNA extracted from the autoclaved chow using phyla and family- specific primers.
